# Supplementary material
Source: PubMed Central journal article supplement (PMC5638688)
Supplement: NIHMS892558-supplement-Supp_Mat.pdf [file NIHMS892558-supplement-Supp_Mat.pdf]

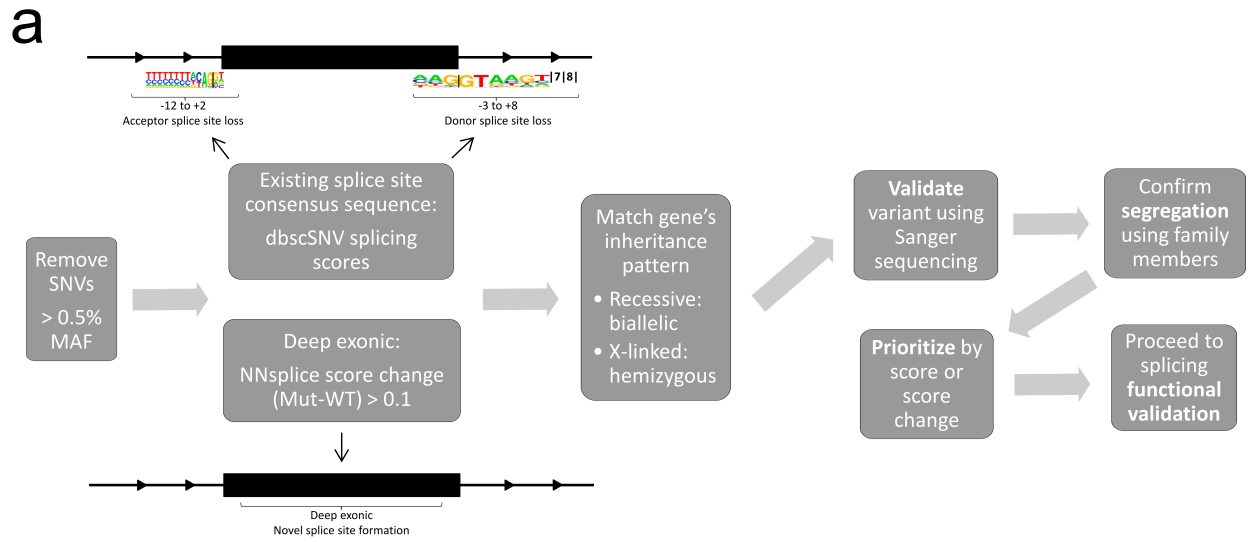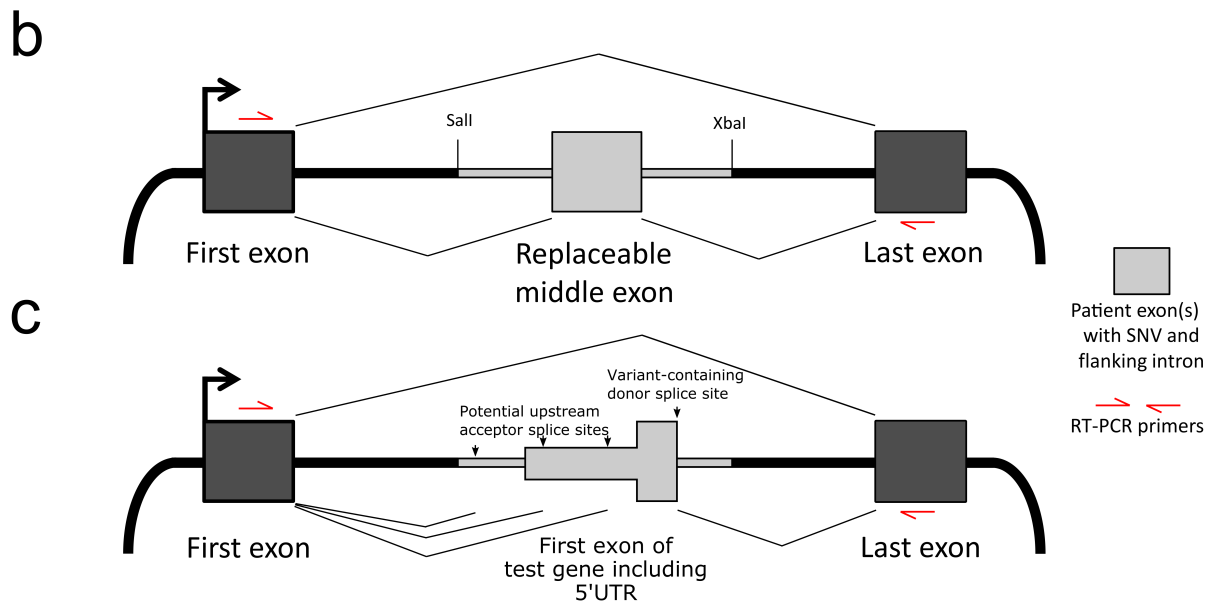

## Supporting Figure S1

(a) Flowchart of prioritization scheme for candidate variant minigene functional validation. (b) Schematic of the RHCglo minigene. (c) Schematic of the RHCglo minigene used for testing loss of the first donor splice site of the *RP2* or *SPATA7* genes using upstream cryptic acceptor splice sites.

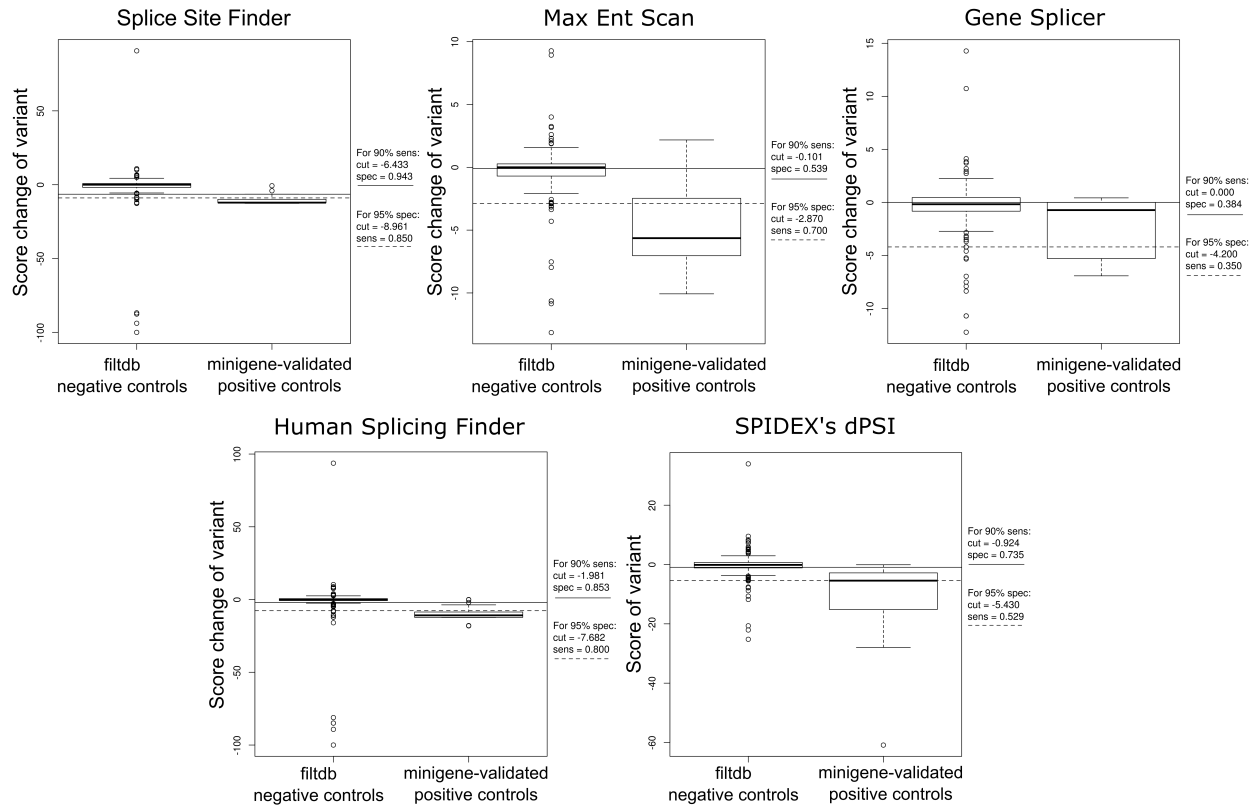

## Supporting Figure S2

Variant score distributions and the corresponding cutoffs needed for 95% specificity and 90% sensitivity for the five splice-affecting variant predictors included in the Figure 4b assessment but not shown in Figure 4a.

**Supporting Table S1 – 281 known retinal disease genes that were screened**

|                 |
|-----------------|
| <i>ABCA4</i>    |
| <i>ABCC6</i>    |
| <i>ABHD12</i>   |
| <i>ACBD5</i>    |
| <i>ADAM9</i>    |
| <i>ADAMTS18</i> |
| <i>ADGRA3</i>   |
| <i>ADGRV1</i>   |
| <i>ADIPOR1</i>  |
| <i>AGBL5</i>    |
| <i>AHI1</i>     |
| <i>AIPL1</i>    |
| <i>ALMS1</i>    |
| <i>APOB</i>     |
| <i>ARL13B</i>   |
| <i>ARL2BP</i>   |
| <i>ARL3</i>     |
| <i>ARL6</i>     |
| <i>ATF6</i>     |
| <i>ATOH7</i>    |
| <i>ATXN7</i>    |
| <i>BBIP1</i>    |
| <i>BBS1</i>     |
| <i>BBS10</i>    |
| <i>BBS12</i>    |
| <i>BBS2</i>     |
| <i>BBS4</i>     |
| <i>BBS5</i>     |
| <i>BBS7</i>     |
| <i>BBS9</i>     |
| <i>BEST1</i>    |
| <i>C10orf11</i> |
| <i>C12orf65</i> |
| <i>C1QTNF5</i>  |
| <i>C21orf2</i>  |
| <i>C2orf71</i>  |
| <i>C8orf37</i>  |
| <i>CA4</i>      |
| <i>CABP4</i>    |
| <i>CACNA1F</i>  |

|                 |
|-----------------|
| <i>CACNA2D4</i> |
| <i>CAPN5</i>    |
| <i>CC2D2A</i>   |
| <i>CDH23</i>    |
| <i>CDH3</i>     |
| <i>CDHR1</i>    |
| <i>CEP164</i>   |
| <i>CEP250</i>   |
| <i>CEP290</i>   |
| <i>CEP41</i>    |
| <i>CERKL</i>    |
| <i>CFH</i>      |
| <i>CHM</i>      |
| <i>CIB2</i>     |
| <i>CISD2</i>    |
| <i>CLN3</i>     |
| <i>CLN5</i>     |
| <i>CLN6</i>     |
| <i>CLN8</i>     |
| <i>CLRN1</i>    |
| <i>CLUAP1</i>   |
| <i>CNGA1</i>    |
| <i>CNGA3</i>    |
| <i>CNGB1</i>    |
| <i>CNGB3</i>    |
| <i>CNNM4</i>    |
| <i>COL11A1</i>  |
| <i>COL2A1</i>   |
| <i>COL9A1</i>   |
| <i>CRB1</i>     |
| <i>CRX</i>      |
| <i>CSPP1</i>    |
| <i>CTNNA1</i>   |
| <i>CTSD</i>     |
| <i>CYP4V2</i>   |
| <i>DHDDS</i>    |
| <i>DHX38</i>    |
| <i>DMD</i>      |
| <i>DRAM2</i>    |
| <i>DTHD1</i>    |
| <i>EFEMP1</i>   |

|                 |
|-----------------|
| <i>ELOVL4</i>   |
| <i>EMC1</i>     |
| <i>EXOSC2</i>   |
| <i>EYS</i>      |
| <i>FAM161A</i>  |
| <i>FLVCR1</i>   |
| <i>FSCN2</i>    |
| <i>FZD4</i>     |
| <i>GDF6</i>     |
| <i>GNAT1</i>    |
| <i>GNAT2</i>    |
| <i>GNB3</i>     |
| <i>GNPTG</i>    |
| <i>GPR143</i>   |
| <i>GPR179</i>   |
| <i>GRK1</i>     |
| <i>GRM6</i>     |
| <i>GUCA1A</i>   |
| <i>GUCA1B</i>   |
| <i>GUCY2D</i>   |
| <i>HARS</i>     |
| <i>HGSNAT</i>   |
| <i>HK1</i>      |
| <i>HMX1</i>     |
| <i>IDH3B</i>    |
| <i>IFT140</i>   |
| <i>IFT172</i>   |
| <i>IFT27</i>    |
| <i>IMPDH1</i>   |
| <i>IMPG1</i>    |
| <i>IMPG2</i>    |
| <i>INPP5E</i>   |
| <i>INVS</i>     |
| <i>IQCB1</i>    |
| <i>ITM2B</i>    |
| <i>JAG1</i>     |
| <i>KCNJ13</i>   |
| <i>KCNV2</i>    |
| <i>KIAA1549</i> |
| <i>KIF11</i>    |
| <i>KIF7</i>     |

|                 |
|-----------------|
| <i>KIZ</i>      |
| <i>KLHL7</i>    |
| <i>LAMA1</i>    |
| <i>LCA5</i>     |
| <i>LRAT</i>     |
| <i>LRIT3</i>    |
| <i>LRP5</i>     |
| <i>LZTFL1</i>   |
| <i>MAK</i>      |
| <i>MAPKAPK3</i> |
| <i>MERTK</i>    |
| <i>MFN2</i>     |
| <i>MFRP</i>     |
| <i>MFSD8</i>    |
| <i>MKKS</i>     |
| <i>MKS1</i>     |
| <i>MTTP</i>     |
| <i>MVK</i>      |
| <i>MYO7A</i>    |
| <i>NBAS</i>     |
| <i>NDP</i>      |
| <i>NEK2</i>     |
| <i>NEUROD1</i>  |
| <i>NMNAT1</i>   |
| <i>NPHP1</i>    |
| <i>NPHP3</i>    |
| <i>NPHP4</i>    |
| <i>NR2E3</i>    |
| <i>NR2F1</i>    |
| <i>NRL</i>      |
| <i>NYX</i>      |
| <i>OAT</i>      |
| <i>OFD1</i>     |
| <i>OPAI</i>     |
| <i>OPA3</i>     |
| <i>OPNILW</i>   |
| <i>OPNIMW</i>   |
| <i>OPNISW</i>   |
| <i>OTX2</i>     |
| <i>PANK2</i>    |
| <i>PAX2</i>     |

|                |
|----------------|
| <i>PAX6</i>    |
| <i>PCDH15</i>  |
| <i>PCYT1A</i>  |
| <i>PDE6A</i>   |
| <i>PDE6B</i>   |
| <i>PDE6C</i>   |
| <i>PDE6G</i>   |
| <i>PDE6H</i>   |
| <i>PDZD7</i>   |
| <i>PEX1</i>    |
| <i>PEX10</i>   |
| <i>PEX11B</i>  |
| <i>PEX12</i>   |
| <i>PEX13</i>   |
| <i>PEX14</i>   |
| <i>PEX16</i>   |
| <i>PEX19</i>   |
| <i>PEX2</i>    |
| <i>PEX26</i>   |
| <i>PEX3</i>    |
| <i>PEX5</i>    |
| <i>PEX6</i>    |
| <i>PEX7</i>    |
| <i>PGK1</i>    |
| <i>PHYH</i>    |
| <i>PITPNM3</i> |
| <i>PLA2G5</i>  |
| <i>PLA2G6</i>  |
| <i>PLK4</i>    |
| <i>PNPLA6</i>  |
| <i>POC1B</i>   |
| <i>POMGNT1</i> |
| <i>PPT1</i>    |
| <i>PRCD</i>    |
| <i>PRDM13</i>  |
| <i>PROM1</i>   |
| <i>PRPF3</i>   |
| <i>PRPF31</i>  |
| <i>PRPF4</i>   |
| <i>PRPF6</i>   |
| <i>PRPF8</i>   |

|                 |
|-----------------|
| <i>PRPH2</i>    |
| <i>PRPS1</i>    |
| <i>RAB28</i>    |
| <i>RAX2</i>     |
| <i>RB1</i>      |
| <i>RBP3</i>     |
| <i>RBP4</i>     |
| <i>RD3</i>      |
| <i>RDH11</i>    |
| <i>RDH12</i>    |
| <i>RDH5</i>     |
| <i>RGR</i>      |
| <i>RGS9</i>     |
| <i>RGS9BP</i>   |
| <i>RHO</i>      |
| <i>RIMS1</i>    |
| <i>RLBP1</i>    |
| <i>ROM1</i>     |
| <i>RP1</i>      |
| <i>RP2</i>      |
| <i>RP9</i>      |
| <i>RPE65</i>    |
| <i>RPGR</i>     |
| <i>RPGRIP1</i>  |
| <i>RPGRIP1L</i> |
| <i>RS1</i>      |
| <i>RTN4IP1</i>  |
| <i>SAG</i>      |
| <i>SDCCAG8</i>  |
| <i>SEMA4A</i>   |
| <i>SLC24A1</i>  |
| <i>SLC25A46</i> |
| <i>SLC38A8</i>  |
| <i>SLC7A14</i>  |
| <i>SNRNP200</i> |
| <i>SPATA7</i>   |
| <i>SPP2</i>     |
| <i>SRD5A3</i>   |
| <i>TCTN3</i>    |
| <i>TEAD1</i>    |
| <i>TIMM8A</i>   |



|                 |
|-----------------|
| <i>TIMP3</i>    |
| <i>TMEM126A</i> |
| <i>TMEM138</i>  |
| <i>TMEM216</i>  |
| <i>TMEM231</i>  |
| <i>TMEM237</i>  |
| <i>TMEM67</i>   |
| <i>TOPORS</i>   |
| <i>TPP1</i>     |
| <i>TRAF3IP1</i> |
| <i>TREX1</i>    |
| <i>TRIM32</i>   |
| <i>TRNT1</i>    |
| <i>TRPM1</i>    |
| <i>TSPAN12</i>  |
| <i>TTC8</i>     |
| <i>TLL5</i>     |
| <i>TTPA</i>     |
| <i>TUB</i>      |
| <i>TUBGCP4</i>  |
| <i>TUBGCP6</i>  |
| <i>TULP1</i>    |
| <i>TYR</i>      |
| <i>UNC119</i>   |
| <i>USH1C</i>    |
| <i>USH1G</i>    |
| <i>USH2A</i>    |
| <i>VCAN</i>     |
| <i>VPS13B</i>   |
| <i>WDPCP</i>    |
| <i>WDR19</i>    |
| <i>WFS1</i>     |
| <i>WHRN</i>     |
| <i>ZNF408</i>   |
| <i>ZNF423</i>   |
| <i>ZNF513</i>   |

**Supporting Table S2 – Raw values from all eight splicing predictors**

| Manuscript Variant ID   | Chrom | hg19 Pos  | Ref | Alt | Splice Site Finder Ref Allele Pred. | Splice Site Finder Alt Allele Pred. | Max Ent Scan Ref Allele Pred. | Max Ent Scan Alt Allele Pred. | Gene Splicer Ref Allele Pred. | Gene Splicer Alt Allele Pred. | Human Splicing Finder Ref Allele Pred. | Human Splicing Finder Alt Allele Pred. | NNsplice Ref Allele Pred. | NNsplice Alt Allele Pred. | dbscSNV ada score | dbscSNV rf score | SPIDEX's dPSI |
|-------------------------|-------|-----------|-----|-----|-------------------------------------|-------------------------------------|-------------------------------|-------------------------------|-------------------------------|-------------------------------|----------------------------------------|----------------------------------------|---------------------------|---------------------------|-------------------|------------------|---------------|
| #1                      | chr14 | 21802869  | G   | A   | 75.895                              | 63.744                              | 9.066                         | 0.911                         | 4.215                         | 0.000                         | 82.911                                 | 70.746                                 | 0.971                     | 0.146                     | 1.000             | 0.982            | -15.578       |
| #2                      | chr5  | 149264037 | C   | A   | 67.908                              | 55.515                              | 2.107                         | 0.000                         | 0.000                         | 0.000                         | 76.057                                 | 63.740                                 | 0.047                     | 0.000                     | 1.000             | 0.924            | -15.144       |
| #3                      | chr6  | 135763715 | C   | A   | 70.384                              | 57.991                              | 5.906                         | 0.000                         | 0.000                         | 0.000                         | 81.241                                 | 68.924                                 | 0.499                     | 0.000                     | 1.000             | 0.964            | -3.163        |
| #4                      | chr16 | 84070302  | C   | T   | 77.422                              | 65.270                              | 10.072                        | 0.000                         | 8.485                         | 2.275                         | 83.176                                 | 71.011                                 | 0.991                     | 0.863                     | 1.000             | 0.928            | -27.041       |
| #5                      | chr12 | 88508350  | A   | C   | 79.104                              | 72.671                              | 0.101                         | 0.000                         | 0.000                         | 0.000                         | 82.308                                 | 78.649                                 | 0.002                     | 0.000                     | 0.986             | 0.666            | -1.189        |
| #6                      | chr1  | 216595191 | T   | A   | 87.078                              | 77.203                              | 8.623                         | 0.000                         | 0.985                         | 0.000                         | 86.086                                 | 78.347                                 | 0.970                     | 0.696                     | 1.000             | 0.844            | -60.877       |
| #7                      | chr14 | 88903941  | G   | T   | 76.896                              | 64.281                              | 6.363                         | 0.000                         | 0.000                         | 0.000                         | 84.411                                 | 73.543                                 | 0.276                     | 0.011                     | 1.000             | 0.998            | -5.239        |
| #8                      | chr1  | 197398744 | T   | C   | 76.998                              | 76.302                              | 5.121                         | 7.298                         | 2.630                         | 3.055                         | 79.837                                 | 79.692                                 | 0.265                     | 0.508                     | 0.090             | 0.334            | -0.080        |
| #9                      | chr14 | 21789561  | G   | A   | 67.372                              | 55.236                              | 2.827                         | 0.000                         | 2.424                         | 0.000                         | 75.536                                 | 64.958                                 | 0.562                     | 0.003                     | 1.000             | 1.000            | -5.437        |
| #10                     | chr1  | 94496547  | C   | T   | 79.074                              | 66.922                              | 9.100                         | 4.291                         | 1.558                         | 0.000                         | 87.862                                 | 75.697                                 | 0.898                     | 0.314                     | 0.998             | 0.858            | -8.772        |
| #11                     | chr1  | 94476351  | C   | T   | 80.397                              | 68.245                              | 9.891                         | 4.518                         | 8.055                         | 3.322                         | 85.491                                 | 73.326                                 | 0.996                     | 0.682                     | 1.000             | 0.988            | -3.217        |
| #12                     | chr1  | 68896965  | C   | A   | 78.340                              | 65.725                              | 6.624                         | 0.000                         | 0.000                         | 0.000                         | 81.872                                 | 71.004                                 | 0.973                     | 0.143                     | 1.000             | 0.940            | -1.101        |
| #13                     | chr2  | 233635615 | G   | A   | 87.607                              | 83.479                              | 8.554                         | 7.274                         | 0.000                         | 0.000                         | 87.682                                 | 85.701                                 | 0.910                     | 0.562                     | 0.999             | 0.922            | -2.820        |
| #14                     | chr12 | 88512415  | C   | T   | 97.417                              | 84.770                              | 0.000                         | 0.000                         | 0.000                         | 0.000                         | 0.000                                  | 0.000                                  | 0.000                     | 0.000                     | 1.000             | .                | -0.924        |
| #15                     | chrX  | 38150209  | T   | A   | 72.039                              | 62.164                              | 7.085                         | 1.883                         | 0.468                         | 0.000                         | 99.336                                 | 81.232                                 | 0.875                     | 0.018                     | 1.000             | 0.926            | -11.061       |
| #16                     | chr1  | 94473856  | G   | T   | 89.450                              | 79.482                              | 10.236                        | 6.237                         | 9.432                         | 3.340                         | 86.852                                 | 77.463                                 | 0.974                     | 0.703                     | 1.000             | 0.852            | -27.956       |
| #17                     | chr1  | 215931934 | T   | A   | 82.520                              | 72.644                              | 8.594                         | 2.539                         | 0.000                         | 0.000                         | 99.177                                 | 81.278                                 | 0.976                     | 0.620                     | 0.982             | 0.638            | -6.321        |
| #21                     | chrX  | 46696640  | A   | C   | 82.282                              | 72.399                              | 8.993                         | 2.515                         | 10.260                        | 3.335                         | 99.895                                 | 81.905                                 | 0.889                     | 0.029                     | 0.999             | 0.890            | .             |
| #22                     | chrX  | 46696637  | G   | A   | 82.282                              | 70.146                              | 8.993                         | 1.160                         | 10.260                        | 4.403                         | 84.795                                 | 74.217                                 | 0.889                     | 0.009                     | 1.000             | 0.992            | .             |
| #23                     | chr14 | 88852181  | G   | A   | 79.775                              | 67.639                              | 8.267                         | 0.820                         | 10.520                        | 4.663                         | 84.141                                 | 73.563                                 | 0.874                     | 0.081                     | 1.000             | 1.000            | .             |
| filtdb negative control | chr1  | 2337277   | C   | T   | 87.283                              | 87.283                              | 13.684                        | 13.457                        | 16.351                        | 15.947                        | 94.664                                 | 94.734                                 | 0.996                     | 0.995                     | 0.000             | 0.002            | .             |
| filtdb negative control | chr1  | 5935162   | A   | T   | 0.000                               | 90.624                              | 0.000                         | 9.269                         | 0.000                         | 14.274                        | 0.000                                  | 93.725                                 | 0.000                     | 0.960                     | .                 | .                | 0.749         |
| filtdb negative control | chr1  | 19561618  | T   | C   | 84.497                              | 84.808                              | 9.459                         | 9.985                         | 5.380                         | 4.877                         | 88.860                                 | 89.262                                 | 0.968                     | 0.976                     | 0.000             | 0.000            | 0.872         |
| filtdb negative control | chr1  | 19568972  | A   | G   | 77.753                              | 74.208                              | 5.933                         | 5.477                         | 2.356                         | 1.215                         | 83.402                                 | 82.508                                 | 0.380                     | 0.182                     | 0.010             | 0.188            | -0.828        |
| filtdb negative control | chr1  | 40557075  | C   | T   | 87.347                              | 87.347                              | 8.704                         | 8.946                         | 5.571                         | 4.809                         | 85.782                                 | 85.852                                 | 0.993                     | 0.995                     | 0.000             | 0.002            | -0.635        |
| filtdb negative control | chr1  | 46655158  | T   | C   | 68.973                              | 68.973                              | 0.425                         | 0.425                         | 0.000                         | 0.000                         | 82.057                                 | 82.057                                 | 0.027                     | 0.027                     | .                 | .                | -1.191        |
| filtdb negative control | chr1  | 94461754  | A   | G   | 85.710                              | 91.886                              | 13.192                        | 13.041                        | 15.676                        | 15.540                        | 87.868                                 | 95.550                                 | 0.983                     | 0.975                     | 0.000             | 0.004            | 7.849         |
| filtdb negative control | chr1  | 94467407  | C   | T   | 78.793                              | 78.793                              | 5.449                         | 5.449                         | 6.466                         | 6.773                         | 83.236                                 | 83.236                                 | 0.582                     | 0.883                     | 0.000             | 0.036            | -0.035        |
| filtdb negative control | chr1  | 94473864  | C   | T   | 89.450                              | 89.450                              | 10.236                        | 9.830                         | 9.432                         | 8.941                         | 86.852                                 | 86.595                                 | 0.974                     | 0.976                     | 0.000             | 0.000            | -0.556        |
| filtdb negative control | chr1  | 103380372 | A   | G   | 76.608                              | 73.062                              | 8.204                         | 7.356                         | 6.528                         | 5.280                         | 75.351                                 | 74.457                                 | 0.856                     | 0.711                     | 0.000             | 0.056            | -2.731        |

|                               |      |           |   |   |        |        |        |        |        |        |        |        |       |       |       |       |        |
|-------------------------------|------|-----------|---|---|--------|--------|--------|--------|--------|--------|--------|--------|-------|-------|-------|-------|--------|
| filtdb<br>negative<br>control | chr1 | 103468295 | C | T | 81.009 | 81.009 | 8.351  | 8.351  | 1.334  | 0.664  | 85.491 | 85.491 | 0.937 | 0.961 | 0.000 | 0.010 | -4.447 |
| filtdb<br>negative<br>control | chr1 | 103468767 | A | T | 68.297 | 78.471 | 4.273  | 7.525  | 1.258  | 4.182  | 75.577 | 84.381 | 0.127 | 0.918 | 0.000 | 0.042 | 33.935 |
| filtdb<br>negative<br>control | chr1 | 103496806 | A | G | 98.688 | 97.983 | 10.580 | 12.043 | 11.822 | 11.781 | 96.824 | 97.477 | 0.997 | 0.997 | 0.000 | 0.000 | -1.345 |
| filtdb<br>negative<br>control | chr1 | 103544434 | A | G | 93.655 | 92.145 | 10.555 | 10.661 | 3.408  | 3.022  | 97.376 | 97.795 | 0.997 | 0.996 | 0.000 | 0.030 | 0.144  |
| filtdb<br>negative<br>control | chr1 | 111661528 | T | C | 83.109 | 83.109 | 8.614  | 8.508  | 3.908  | 4.963  | 86.790 | 86.909 | 0.790 | 0.846 | 0.000 | 0.004 | -0.861 |
| filtdb<br>negative<br>control | chr1 | 150318872 | C | T | 95.773 | 99.060 | 11.539 | 11.561 | 8.606  | 9.111  | 93.582 | 94.836 | 0.994 | 0.996 | 0.017 | 0.166 | 2.895  |
| filtdb<br>negative<br>control | chr1 | 161823011 | T | A | 83.493 | 79.702 | 6.345  | 5.196  | 3.102  | 2.803  | 82.948 | 81.241 | 0.910 | 0.110 | 0.015 | 0.120 | -0.974 |
| filtdb<br>negative<br>control | chr1 | 196696078 | T | A | 77.220 | 77.220 | 6.035  | 6.035  | 0.000  | 0.000  | 89.668 | 89.668 | 0.152 | 0.228 | 0.000 | 0.006 | -0.886 |
| filtdb<br>negative<br>control | chr1 | 196712577 | T | C | 95.383 | 92.262 | 9.258  | 8.554  | 9.441  | 8.125  | 91.530 | 90.636 | 0.984 | 0.975 | 0.000 | 0.028 | -3.643 |
| filtdb<br>negative<br>control | chr1 | 197297540 | A | T | 87.458 | 89.912 | 9.689  | 10.684 | 9.010  | 10.311 | 84.562 | 87.913 | 0.990 | 0.996 | 0.000 | 0.002 | 0.843  |
| filtdb<br>negative<br>control | chr1 | 216371934 | A | C | 89.493 | 84.328 | 9.731  | 8.937  | 1.817  | 0.000  | 83.407 | 81.478 | 0.877 | 0.498 | 0.003 | 0.164 | -3.664 |
| filtdb<br>negative<br>control | chr2 | 15616013  | C | G | 83.187 | 83.187 | 9.102  | 10.403 | 9.318  | 11.207 | 82.757 | 84.670 | 0.987 | 0.994 | 0.000 | 0.000 | 2.587  |
| filtdb<br>negative<br>control | chr2 | 15676686  | G | A | 80.945 | 84.704 | 8.425  | 9.380  | 6.900  | 7.360  | 85.532 | 87.380 | 0.988 | 0.993 | 0.000 | 0.000 | 0.566  |
| filtdb<br>negative<br>control | chr2 | 21227331  | G | A | 97.550 | 99.060 | 10.927 | 11.422 | 9.235  | 10.354 | 94.840 | 94.421 | 0.988 | 0.992 | 0.000 | 0.008 | 0.928  |
| filtdb<br>negative<br>control | chr2 | 21238142  | C | T | 82.337 | 82.248 | 8.392  | 7.521  | 7.978  | 7.496  | 84.257 | 84.142 | 0.868 | 0.761 | 0.001 | 0.050 | -0.179 |
| filtdb<br>negative<br>control | chr2 | 21252899  | G | A | 81.819 | 85.134 | 9.545  | 9.192  | 7.861  | 7.996  | 82.033 | 83.287 | 0.991 | 0.994 | 0.000 | 0.000 | 0.984  |
| filtdb<br>negative<br>control | chr2 | 21260136  | G | A | 84.991 | 87.654 | 12.012 | 12.688 | 9.967  | 10.523 | 87.242 | 88.428 | 0.998 | 0.998 | 0.000 | 0.018 | 1.675  |
| filtdb<br>negative<br>control | chr2 | 27279013  | A | G | 80.228 | 80.228 | 6.708  | 6.708  | 2.383  | 1.713  | 88.165 | 88.165 | 0.853 | 0.845 | 0.000 | 0.002 | -0.124 |
| filtdb<br>negative<br>control | chr2 | 27706816  | G | A | 83.916 | 87.230 | 9.263  | 9.524  | 8.930  | 9.394  | 88.234 | 89.488 | 0.864 | 0.894 | 0.000 | 0.000 | 4.353  |
| filtdb<br>negative<br>control | chr2 | 62065851  | C | T | 91.456 | 91.456 | 5.785  | 4.776  | 2.625  | 1.594  | 91.414 | 91.157 | 0.435 | 0.504 | 0.157 | 0.358 | 0.390  |
| filtdb<br>negative<br>control | chr2 | 63401973  | G | A | 82.575 | 84.678 | 7.781  | 7.428  | 2.419  | 2.643  | 85.788 | 85.135 | 0.883 | 0.919 | 0.000 | 0.000 | -1.813 |
| filtdb<br>negative<br>control | chr2 | 73761942  | C | T | 84.995 | 87.659 | 9.423  | 10.247 | 3.723  | 4.422  | 85.121 | 86.307 | 0.982 | 0.990 | .     | .     | 8.331  |
| filtdb<br>negative<br>control | chr2 | 73828310  | T | C | 85.409 | 82.094 | 6.310  | 5.344  | 5.459  | 4.345  | 86.654 | 85.400 | 0.199 | 0.135 | .     | .     | -2.003 |
| filtdb<br>negative<br>control | chr2 | 96956561  | G | A | 88.541 | 90.350 | 11.506 | 11.173 | 9.733  | 9.713  | 87.011 | 86.399 | 0.973 | 0.974 | 0.000 | 0.000 | 2.287  |
| filtdb                        | chr2 | 112656372 | A | T | 92.583 | 84.072 | 10.033 | 8.946  | 22.005 | 14.489 | 97.080 | 92.330 | 0.995 | 0.988 | 0.088 | 0.370 | .      |

|                         |      |           |   |   |         |        |        |        |        |        |        |        |       |       |       |       |         |
|-------------------------|------|-----------|---|---|---------|--------|--------|--------|--------|--------|--------|--------|-------|-------|-------|-------|---------|
| negative control        |      |           |   |   |         |        |        |        |        |        |        |        |       |       |       |       |         |
| filtdb negative control | chr2 | 112705143 | A | G | 100.000 | 91.039 | 10.858 | 10.749 | 7.156  | 4.513  | 99.999 | 95.143 | 0.999 | 0.998 | 0.007 | 0.248 | -1.144  |
| filtdb negative control | chr2 | 112722854 | G | A | 93.915  | 81.779 | 10.218 | 7.309  | 11.623 | 7.023  | 96.871 | 86.293 | 0.999 | 0.969 | 1.000 | 0.962 | -1.918  |
| filtdb negative control | chr2 | 112776979 | C | A | 75.428  | 72.964 | 7.229  | 6.070  | 6.304  | 4.395  | 78.293 | 76.225 | 0.443 | 0.134 | 0.017 | 0.042 | -0.280  |
| filtdb negative control | chr2 | 182414358 | T | C | 81.582  | 77.220 | 8.905  | 6.035  | 2.169  | 0.900  | 85.860 | 85.206 | 0.994 | 0.890 | 0.972 | 0.598 | -1.648  |
| filtdb negative control | chr2 | 182468562 | A | C | 100.000 | 0.000  | 10.858 | 0.000  | 5.236  | 0.000  | 99.999 | 0.000  | 0.998 | 0.000 | 1.000 | 0.926 | -20.667 |
| filtdb negative control | chr2 | 182468818 | A | T | 99.409  | 98.465 | 9.612  | 8.914  | 9.036  | 6.980  | 97.658 | 94.307 | 0.978 | 0.910 | 0.000 | 0.036 | -1.493  |
| filtdb negative control | chr2 | 202498027 | T | C | 72.148  | 72.148 | 3.631  | 3.631  | 0.000  | 0.000  | 77.792 | 77.792 | 0.180 | 0.358 | 0.000 | 0.052 | -0.029  |
| filtdb negative control | chr2 | 239306324 | G | A | 77.484  | 87.564 | 4.407  | 8.409  | 8.064  | 11.776 | 86.807 | 95.147 | 0.597 | 0.951 | 0.000 | 0.040 | 1.872   |
| filtdb negative control | chr3 | 97510607  | C | T | 80.320  | 82.130 | 7.341  | 7.389  | 2.421  | 2.669  | 87.868 | 87.256 | 0.817 | 0.840 | 0.000 | 0.000 | 4.018   |
| filtdb negative control | chr3 | 129251263 | C | T | 81.141  | 81.753 | 9.402  | 8.978  | 10.680 | 9.748  | 87.502 | 87.502 | 0.956 | 0.941 | 0.000 | 0.002 | 1.409   |
| filtdb negative control | chr3 | 132409501 | A | G | 79.272  | 77.762 | 8.252  | 8.528  | 4.643  | 4.869  | 79.353 | 79.772 | 0.968 | 0.949 | 0.000 | 0.000 | -1.362  |
| filtdb negative control | chr3 | 132416206 | C | T | 78.267  | 74.356 | 5.951  | 4.044  | 5.038  | 3.723  | 80.056 | 76.926 | 0.718 | 0.444 | 0.759 | 0.674 | -0.169  |
| filtdb negative control | chr3 | 150658264 | G | A | 76.515  | 77.127 | 8.397  | 7.635  | 1.924  | 1.085  | 77.924 | 77.924 | 0.907 | 0.699 | 0.005 | 0.070 | 0.709   |
| filtdb negative control | chr3 | 170198967 | G | A | 80.435  | 83.749 | 7.716  | 8.218  | 8.302  | 9.592  | 90.823 | 92.077 | 0.967 | 0.975 | 0.000 | 0.030 | .       |
| filtdb negative control | chr3 | 193355074 | T | C | 80.866  | 80.254 | 8.789  | 9.501  | 2.590  | 3.510  | 86.339 | 86.339 | 0.951 | 0.985 | 0.000 | 0.002 | -2.334  |
| filtdb negative control | chr4 | 651287    | C | T | 71.323  | 71.934 | 6.485  | 3.121  | 7.385  | 4.656  | 83.353 | 83.353 | 0.547 | 0.224 | 0.023 | 0.224 | 1.895   |
| filtdb negative control | chr4 | 6292915   | A | G | 84.596  | 84.596 | 6.323  | 6.529  | 7.756  | 9.518  | 90.671 | 90.790 | 0.910 | 0.910 | 0.000 | 0.000 | 0.451   |
| filtdb negative control | chr4 | 15482322  | C | T | 86.356  | 88.459 | 8.777  | 8.938  | 9.792  | 10.183 | 93.677 | 93.024 | 0.865 | 0.919 | 0.000 | 0.000 | 1.772   |
| filtdb negative control | chr4 | 15482809  | G | A | 75.849  | 75.849 | 8.569  | 8.569  | 5.135  | 5.135  | 82.805 | 82.805 | 0.989 | 0.989 | 0.000 | 0.000 | .       |
| filtdb negative control | chr4 | 15568992  | T | C | 82.181  | 80.371 | 7.632  | 7.392  | 8.123  | 7.709  | 84.044 | 84.656 | 0.780 | 0.765 | 0.000 | 0.000 | -0.808  |
| filtdb negative control | chr4 | 15982166  | A | G | 88.601  | 87.895 | 8.402  | 9.973  | 4.705  | 5.517  | 85.841 | 86.494 | 0.986 | 0.987 | 0.000 | 0.030 | -0.440  |
| filtdb negative control | chr4 | 15985984  | G | C | 72.690  | 71.370 | 10.259 | 7.099  | 10.265 | 6.572  | 80.813 | 77.328 | 0.896 | 0.492 | 0.221 | 0.446 | -3.947  |
| filtdb negative control | chr4 | 15994019  | G | A | 89.161  | 92.706 | 7.584  | 8.808  | 4.590  | 5.708  | 90.615 | 91.509 | 0.972 | 0.980 | 0.000 | 0.000 | 2.236   |
| filtdb negative control | chr4 | 16020162  | C | T | 77.857  | 77.857 | 7.278  | 6.615  | 2.718  | 1.971  | 78.839 | 78.668 | 0.523 | 0.494 | 0.000 | 0.016 | -0.077  |

|                               |      |           |   |   |         |         |        |        |        |        |        |        |       |       |       |       |        |
|-------------------------------|------|-----------|---|---|---------|---------|--------|--------|--------|--------|--------|--------|-------|-------|-------|-------|--------|
| control                       |      |           |   |   |         |         |        |        |        |        |        |        |       |       |       |       |        |
| filtdb<br>negative<br>control | chr4 | 16037352  | C | T | 82.523  | 82.213  | 9.064  | 8.376  | 3.544  | 2.949  | 84.947 | 84.545 | 0.847 | 0.813 | 0.000 | 0.010 | 5.343  |
| filtdb<br>negative<br>control | chr4 | 39216221  | C | T | 93.812  | 93.326  | 8.767  | 8.441  | 3.458  | 3.090  | 89.628 | 89.492 | 0.911 | 0.918 | 0.001 | 0.022 | 1.374  |
| filtdb<br>negative<br>control | chr4 | 39219593  | T | C | 84.557  | 81.274  | 9.293  | 8.756  | 7.393  | 6.859  | 82.039 | 81.331 | 0.986 | 0.969 | 0.000 | 0.010 | -0.600 |
| filtdb<br>negative<br>control | chr4 | 122749436 | G | T | 81.786  | 78.870  | 10.149 | 9.572  | 3.871  | 2.165  | 77.818 | 75.721 | 0.825 | 0.609 | 0.001 | 0.020 | -5.519 |
| filtdb<br>negative<br>control | chr4 | 187122304 | C | T | 81.165  | 82.676  | 7.929  | 8.016  | 3.865  | 3.509  | 83.835 | 83.416 | 0.320 | 0.500 | 0.000 | 0.000 | -3.408 |
| filtdb<br>negative<br>control | chr5 | 82841476  | T | C | 82.032  | 82.032  | 8.846  | 8.846  | 4.290  | 3.628  | 90.933 | 90.933 | 0.981 | 0.992 | 0.000 | 0.002 | -0.579 |
| filtdb<br>negative<br>control | chr5 | 82875800  | C | T | 81.734  | 81.734  | 6.640  | 7.643  | 3.583  | 4.962  | 80.897 | 81.742 | 0.940 | 0.972 | 0.000 | 0.014 | -0.299 |
| filtdb<br>negative<br>control | chr5 | 89938443  | A | T | 83.666  | 87.033  | 10.879 | 13.181 | 4.529  | 8.355  | 82.649 | 85.844 | 0.962 | 0.988 | 0.000 | 0.026 | 0.144  |
| filtdb<br>negative<br>control | chr5 | 89938587  | C | T | 87.557  | 87.557  | 9.722  | 9.722  | 1.626  | 1.528  | 88.467 | 88.467 | 0.971 | 0.984 | 0.000 | 0.000 | 1.535  |
| filtdb<br>negative<br>control | chr5 | 89940513  | C | A | 85.599  | 85.224  | 8.485  | 7.953  | 4.121  | 3.046  | 86.936 | 84.449 | 0.632 | 0.173 | 0.000 | 0.094 | -0.378 |
| filtdb<br>negative<br>control | chr5 | 89988412  | G | A | 81.114  | 81.025  | 8.034  | 7.381  | 2.407  | 2.132  | 83.650 | 83.535 | 0.939 | 0.930 | 0.000 | 0.018 | -0.353 |
| filtdb<br>negative<br>control | chr5 | 90078934  | A | G | 0.000   | 0.000   | 3.776  | 3.899  | 1.041  | 1.796  | 89.431 | 89.385 | 0.053 | 0.045 | 0.000 | .     | 1.153  |
| filtdb<br>negative<br>control | chr5 | 90087161  | C | G | 79.951  | 76.896  | 7.442  | 6.363  | 0.780  | 0.000  | 86.171 | 84.411 | 0.557 | 0.510 | 0.985 | 0.674 | -0.867 |
| filtdb<br>negative<br>control | chr5 | 90445843  | G | T | 100.000 | 100.000 | 12.160 | 12.800 | 11.651 | 11.201 | 97.094 | 97.058 | 0.997 | 0.997 | 0.000 | 0.008 | 1.881  |
| filtdb<br>negative<br>control | chr5 | 90449031  | T | C | 63.989  | 62.478  | 5.746  | 4.620  | 1.748  | 1.128  | 74.299 | 74.718 | 0.005 | 0.002 | 0.000 | 0.052 | -2.599 |
| filtdb<br>negative<br>control | chr5 | 90459600  | T | G | 90.168  | 90.168  | 9.459  | 7.508  | 8.106  | 6.376  | 90.681 | 90.081 | 0.823 | 0.602 | 0.004 | 0.136 | .      |
| filtdb<br>negative<br>control | chr5 | 138221989 | G | C | 81.829  | 81.829  | 6.987  | 6.987  | 3.140  | 2.420  | 85.508 | 85.508 | 0.668 | 0.505 | 0.000 | 0.010 | -0.536 |
| filtdb<br>negative<br>control | chr5 | 140054257 | C | T | 87.564  | 87.564  | 8.409  | 8.409  | 8.262  | 7.573  | 95.147 | 95.147 | 0.925 | 0.965 | 0.000 | 0.002 | 0.245  |
| filtdb<br>negative<br>control | chr5 | 178408861 | C | T | 69.892  | 69.892  | 7.143  | 7.491  | 9.432  | 9.257  | 75.805 | 75.872 | 0.628 | 0.550 | 0.000 | 0.038 | .      |
| filtdb<br>negative<br>control | chr5 | 178410234 | A | G | 86.265  | 82.950  | 8.561  | 7.479  | 8.736  | 7.944  | 90.841 | 89.587 | 0.677 | 0.576 | 0.002 | 0.114 | -0.193 |
| filtdb<br>negative<br>control | chr5 | 178415937 | A | G | 86.820  | 86.417  | 10.126 | 11.453 | 12.691 | 14.347 | 93.136 | 93.136 | 0.976 | 0.991 | 0.000 | 0.014 | -0.795 |
| filtdb<br>negative<br>control | chr6 | 42153410  | C | T | 85.853  | 85.853  | 9.477  | 9.477  | 7.041  | 6.543  | 91.960 | 91.960 | 0.964 | 0.955 | 0.002 | 0.032 | -0.114 |
| filtdb<br>negative<br>control | chr6 | 42933526  | C | T | 85.315  | 85.315  | 10.164 | 9.254  | 8.947  | 7.836  | 92.065 | 91.894 | 0.970 | 0.973 | 0.003 | 0.094 | 0.187  |
| filtdb<br>negative<br>control | chr6 | 42942779  | A | G | 83.690  | 89.867  | 3.990  | 5.900  | 2.697  | 3.701  | 82.027 | 89.709 | 0.358 | 0.363 | 0.000 | 0.016 | -0.781 |

|                               |      |           |   |   |        |        |        |        |        |        |        |        |       |       |       |       |         |
|-------------------------------|------|-----------|---|---|--------|--------|--------|--------|--------|--------|--------|--------|-------|-------|-------|-------|---------|
| filtdb<br>negative<br>control | chr6 | 65016979  | A | C | 86.346 | 86.346 | 13.208 | 14.325 | 10.944 | 12.699 | 91.019 | 91.055 | 0.991 | 0.989 | 0.000 | 0.002 | -1.665  |
| filtdb<br>negative<br>control | chr6 | 65336143  | G | A | 87.895 | 89.304 | 11.254 | 11.260 | 10.172 | 10.239 | 86.605 | 87.499 | 0.996 | 0.996 | 0.000 | 0.000 | 0.391   |
| filtdb<br>negative<br>control | chr6 | 65612113  | C | T | 88.194 | 84.283 | 6.556  | 4.482  | 2.073  | 0.000  | 81.718 | 78.588 | 0.812 | 0.530 | 0.011 | 0.128 | -1.835  |
| filtdb<br>negative<br>control | chr6 | 66063513  | G | A | 91.529 | 85.352 | 9.528  | 8.332  | 8.027  | 5.832  | 90.071 | 82.389 | 0.982 | 0.988 | 0.000 | 0.032 | -1.665  |
| filtdb<br>negative<br>control | chr6 | 70981794  | A | G | 87.814 | 93.991 | 10.837 | 10.980 | 5.094  | 5.343  | 82.252 | 89.934 | 0.977 | 0.968 | 0.000 | 0.000 | 1.472   |
| filtdb<br>negative<br>control | chr6 | 71010101  | A | G | 95.313 | 91.998 | 11.174 | 9.415  | 6.847  | 5.788  | 93.889 | 92.635 | 0.953 | 0.941 | 0.005 | 0.110 | -0.492  |
| filtdb<br>negative<br>control | chr6 | 76660271  | C | T | 87.127 | 87.127 | 10.098 | 10.098 | 10.309 | 9.514  | 94.090 | 94.090 | 0.914 | 0.963 | 0.000 | 0.000 | -0.074  |
| filtdb<br>negative<br>control | chr6 | 76728584  | A | T | 90.748 | 85.138 | 7.653  | 6.994  | 6.864  | 5.646  | 89.081 | 85.863 | 0.732 | 0.262 | 0.015 | 0.322 | -7.582  |
| filtdb<br>negative<br>control | chr6 | 80198945  | T | C | 71.160 | 71.395 | 7.087  | 7.015  | 2.149  | 1.891  | 72.524 | 72.713 | 0.824 | 0.826 | 0.000 | 0.036 | 0.656   |
| filtdb<br>negative<br>control | chr6 | 80202376  | C | G | 90.758 | 93.172 | 9.709  | 10.232 | 8.075  | 9.465  | 91.796 | 93.704 | 0.960 | 0.973 | 0.000 | 0.000 | 0.440   |
| filtdb<br>negative<br>control | chr6 | 135777075 | A | C | 92.749 | 88.990 | 4.389  | 4.225  | 0.000  | 0.000  | 90.036 | 86.377 | 0.702 | 0.283 | 0.017 | 0.260 | -0.340  |
| filtdb<br>negative<br>control | chr7 | 33136983  | G | A | 90.713 | 93.425 | 13.553 | 12.266 | 11.605 | 11.937 | 86.861 | 88.047 | 0.997 | 0.998 | 0.000 | 0.002 | 0.146   |
| filtdb<br>negative<br>control | chr7 | 33376047  | T | C | 80.237 | 78.133 | 8.424  | 7.930  | 7.600  | 6.486  | 80.405 | 81.058 | 0.937 | 0.905 | 0.000 | 0.014 | -0.317  |
| filtdb<br>negative<br>control | chr7 | 92129162  | A | G | 91.917 | 88.840 | 9.305  | 9.024  | 8.907  | 8.083  | 88.598 | 87.890 | 0.969 | 0.946 | 0.000 | 0.002 | -0.687  |
| filtdb<br>negative<br>control | chr7 | 92147580  | C | G | 84.274 | 86.606 | 9.661  | 10.247 | 2.921  | 3.918  | 82.076 | 83.887 | 0.877 | 0.940 | 0.000 | 0.000 | 2.297   |
| filtdb<br>negative<br>control | chr7 | 138566341 | C | G | 81.782 | 84.113 | 10.132 | 9.851  | 7.303  | 7.341  | 84.420 | 86.231 | 0.159 | 0.357 | 0.000 | 0.022 | 0.664   |
| filtdb<br>negative<br>control | chr8 | 43054522  | C | G | 81.732 | 81.489 | 9.310  | 7.745  | 9.509  | 8.553  | 85.536 | 83.623 | 0.796 | 0.429 | 0.001 | 0.132 | .       |
| filtdb<br>negative<br>control | chr8 | 63973988  | A | C | 86.157 | 86.157 | 6.645  | 6.437  | 2.473  | 2.743  | 84.448 | 84.484 | 0.754 | 0.687 | 0.104 | 0.192 | .       |
| filtdb<br>negative<br>control | chr8 | 63978657  | C | A | 86.778 | 0.000  | 7.970  | 0.000  | 3.171  | 0.000  | 81.129 | 0.000  | 0.981 | 0.000 | 1.000 | 0.936 | -8.828  |
| filtdb<br>negative<br>control | chr8 | 87680407  | A | G | 78.204 | 74.477 | 7.217  | 6.725  | 7.077  | 6.045  | 79.327 | 77.479 | 0.409 | 0.231 | 0.000 | 0.102 | -3.924  |
| filtdb<br>negative<br>control | chr8 | 94768004  | A | T | 93.823 | 0.000  | 13.155 | 0.000  | 12.243 | 0.000  | 89.205 | 0.000  | 0.997 | 0.000 | 1.000 | 0.930 | -22.077 |
| filtdb<br>negative<br>control | chr8 | 94794620  | C | T | 91.292 | 85.115 | 6.568  | 5.991  | 3.736  | 2.467  | 88.635 | 80.953 | 0.973 | 0.974 | 0.000 | 0.142 | -0.125  |
| filtdb<br>negative<br>control | chr8 | 96276013  | G | A | 92.304 | 95.401 | 11.460 | 12.353 | 7.942  | 8.818  | 93.292 | 95.140 | 0.990 | 0.994 | 0.000 | 0.000 | 1.952   |
| filtdb<br>negative<br>control | chr8 | 100493820 | C | T | 90.888 | 92.399 | 10.261 | 11.101 | 9.452  | 10.571 | 92.059 | 91.640 | 0.981 | 0.988 | 0.000 | 0.026 | -0.037  |
| filtdb                        | chr8 | 100844595 | A | T | 87.579 | 0.000  | 10.642 | 0.000  | 10.705 | 0.000  | 84.909 | 0.000  | 0.996 | 0.000 | 1.000 | 0.914 | -4.647  |

|                         |       |           |   |   |        |        |        |        |        |        |        |        |       |       |       |       |        |
|-------------------------|-------|-----------|---|---|--------|--------|--------|--------|--------|--------|--------|--------|-------|-------|-------|-------|--------|
| negative control        |       |           |   |   |        |        |        |        |        |        |        |        |       |       |       |       |        |
| filtdb negative control | chr8  | 100844596 | G | T | 87.579 | 0.000  | 10.642 | 0.000  | 10.705 | 0.000  | 84.909 | 0.000  | 0.996 | 0.000 | 1.000 | 0.934 | -4.970 |
| filtdb negative control | chr8  | 100844598 | A | T | 87.579 | 87.579 | 10.642 | 11.228 | 10.705 | 11.433 | 84.909 | 85.680 | 0.996 | 0.997 | 0.000 | 0.002 | -0.604 |
| filtdb negative control | chr9  | 103015184 | T | C | 95.502 | 91.956 | 11.340 | 9.787  | 9.521  | 8.499  | 90.890 | 89.996 | 0.847 | 0.776 | 0.001 | 0.056 | 1.305  |
| filtdb negative control | chr9  | 116048977 | T | C | 81.609 | 79.799 | 9.217  | 8.633  | 7.867  | 7.609  | 80.868 | 81.480 | 0.923 | 0.933 | 0.000 | 0.012 | 0.061  |
| filtdb negative control | chr9  | 139327034 | A | G | 85.296 | 85.296 | 8.226  | 8.226  | 9.248  | 9.216  | 88.677 | 88.677 | 0.883 | 0.918 | .     | .     | 0.754  |
| filtdb negative control | chr9  | 139327599 | G | A | 79.778 | 79.778 | 8.066  | 8.066  | 9.314  | 9.020  | 88.326 | 88.326 | 0.778 | 0.703 | 0.000 | 0.000 | -0.413 |
| filtdb negative control | chr10 | 27507119  | C | T | 79.718 | 79.718 | 5.095  | 5.234  | 3.853  | 4.569  | 79.390 | 79.436 | 0.294 | 0.318 | 0.000 | 0.000 | 0.133  |
| filtdb negative control | chr10 | 55663134  | G | A | 95.012 | 95.012 | 9.813  | 9.510  | 7.553  | 7.526  | 94.192 | 93.532 | 0.865 | 0.878 | 0.001 | 0.010 | 0.151  |
| filtdb negative control | chr10 | 55949151  | G | A | 84.412 | 84.412 | 5.545  | 5.545  | 6.150  | 6.150  | 83.506 | 83.506 | 0.894 | 0.894 | 0.001 | 0.034 | -2.885 |
| filtdb negative control | chr10 | 55955444  | T | G | 84.330 | 75.416 | 9.115  | 8.564  | 0.647  | 0.000  | 87.371 | 82.621 | 0.988 | 0.967 | 0.994 | 0.946 | -0.937 |
| filtdb negative control | chr10 | 56077209  | G | A | 91.272 | 93.082 | 12.193 | 12.750 | 14.237 | 14.553 | 91.432 | 90.820 | 0.974 | 0.974 | 0.000 | 0.000 | 9.524  |
| filtdb negative control | chr10 | 56287569  | T | C | 91.182 | 86.820 | 11.013 | 10.126 | 4.904  | 4.302  | 94.128 | 93.475 | 0.995 | 0.987 | 0.001 | 0.034 | -1.659 |
| filtdb negative control | chr10 | 71060621  | C | T | 91.616 | 91.616 | 10.065 | 10.065 | 2.969  | 2.969  | 95.904 | 95.904 | 0.997 | 0.997 | 0.000 | 0.000 | 0.775  |
| filtdb negative control | chr10 | 71103597  | C | G | 83.136 | 83.136 | 10.751 | 10.751 | 16.031 | 16.377 | 91.627 | 91.627 | 0.987 | 0.984 | .     | .     | 0.761  |
| filtdb negative control | chr10 | 71129194  | C | T | 87.167 | 80.990 | 7.963  | 8.710  | 9.205  | 7.938  | 89.514 | 81.832 | 0.882 | 0.922 | 0.000 | 0.024 | -1.180 |
| filtdb negative control | chr10 | 71136851  | T | C | 77.477 | 71.698 | 6.842  | 5.002  | 7.913  | 0.000  | 80.127 | 77.953 | 0.911 | 0.345 | 0.975 | 0.738 | -0.210 |
| filtdb negative control | chr10 | 73490214  | C | T | 78.699 | 82.014 | 8.921  | 10.120 | 10.334 | 11.406 | 88.763 | 90.017 | 0.914 | 0.933 | 0.000 | 0.000 | 0.485  |
| filtdb negative control | chr10 | 73544638  | A | G | 73.481 | 73.741 | 6.475  | 6.169  | 9.210  | 9.389  | 81.221 | 81.336 | 0.591 | 0.745 | 0.000 | 0.002 | -3.727 |
| filtdb negative control | chr10 | 73570334  | G | A | 86.723 | 86.723 | 10.898 | 10.898 | 10.734 | 10.217 | 94.090 | 94.090 | 0.993 | 0.994 | 0.000 | 0.000 | -0.066 |
| filtdb negative control | chr10 | 85956412  | G | A | 81.753 | 81.443 | 8.978  | 8.549  | 4.290  | 4.298  | 87.502 | 87.100 | 0.922 | 0.920 | 0.001 | 0.042 | -0.277 |
| filtdb negative control | chr10 | 85965574  | C | T | 87.171 | 89.883 | 6.908  | 7.611  | 3.521  | 4.243  | 91.002 | 92.188 | 0.862 | 0.906 | 0.000 | 0.000 | 2.319  |
| filtdb negative control | chr10 | 94409749  | T | C | 78.934 | 73.156 | 6.889  | 4.807  | 0.957  | 0.557  | 83.084 | 80.910 | 0.956 | 0.892 | 0.056 | 0.346 | -0.849 |
| filtdb negative control | chr10 | 95395245  | C | T | 90.281 | 92.992 | 9.828  | 8.985  | 4.129  | 4.367  | 87.038 | 88.224 | 0.863 | 0.938 | 0.000 | 0.002 | -0.343 |
| filtdb negative control | chr10 | 95395247  | A | G | 90.281 | 90.281 | 9.828  | 9.437  | 4.129  | 3.825  | 87.038 | 86.992 | 0.863 | 0.841 | 0.000 | 0.000 | 0.264  |

|                               |       |           |   |   |        |        |        |        |        |        |        |        |       |       |       |       |         |
|-------------------------------|-------|-----------|---|---|--------|--------|--------|--------|--------|--------|--------|--------|-------|-------|-------|-------|---------|
| control                       |       |           |   |   |        |        |        |        |        |        |        |        |       |       |       |       |         |
| filtdb<br>negative<br>control | chr10 | 97447487  | T | A | 55.879 | 62.550 | 3.895  | 4.845  | 0.000  | 0.000  | 69.822 | 73.738 | 0.000 | 0.002 | 0.572 | 0.624 | 0.563   |
| filtdb<br>negative<br>control | chr10 | 102783678 | T | C | 94.221 | 94.221 | 9.884  | 9.884  | 9.199  | 9.712  | 97.825 | 97.825 | 0.998 | 0.994 | 0.000 | 0.000 | -0.730  |
| filtdb<br>negative<br>control | chr11 | 6636668   | C | T | 89.215 | 77.063 | 10.655 | 7.794  | 8.264  | 4.743  | 91.195 | 79.030 | 0.998 | 0.937 | 0.378 | 0.310 | -2.274  |
| filtdb<br>negative<br>control | chr11 | 12903443  | C | T | 83.701 | 83.215 | 9.536  | 9.837  | 8.592  | 8.593  | 88.773 | 88.637 | 0.839 | 0.875 | .     | .     | -0.088  |
| filtdb<br>negative<br>control | chr11 | 17517235  | A | G | 77.185 | 73.084 | 5.621  | 4.923  | 5.339  | 0.000  | 77.261 | 75.413 | 0.527 | 0.479 | 0.001 | 0.074 | -3.460  |
| filtdb<br>negative<br>control | chr11 | 17526255  | A | G | 87.768 | 84.041 | 9.275  | 9.588  | 9.184  | 8.582  | 87.588 | 85.740 | 0.911 | 0.897 | 0.000 | 0.026 | -4.453  |
| filtdb<br>negative<br>control | chr11 | 17526256  | A | G | 87.768 | 84.481 | 9.275  | 8.901  | 9.184  | 8.585  | 87.588 | 86.334 | 0.911 | 0.871 | 0.000 | 0.000 | -5.458  |
| filtdb<br>negative<br>control | chr11 | 17542553  | C | T | 77.105 | 77.105 | 7.533  | 6.779  | 0.000  | 0.000  | 83.792 | 83.603 | 0.480 | 0.446 | 0.000 | 0.060 | -0.541  |
| filtdb<br>negative<br>control | chr11 | 31815362  | G | A | 83.669 | 86.984 | 8.698  | 9.109  | 8.380  | 9.439  | 90.125 | 91.379 | 0.937 | 0.945 | 0.000 | 0.000 | 0.551   |
| filtdb<br>negative<br>control | chr11 | 61161357  | T | G | 92.658 | 92.658 | 8.572  | 6.621  | 5.771  | 4.041  | 88.996 | 88.396 | 0.945 | 0.845 | 0.001 | 0.036 | -1.650  |
| filtdb<br>negative<br>control | chr11 | 61165732  | G | C | 0.000  | 0.000  | 0.000  | 0.000  | 0.000  | 0.000  | 0.000  | 0.000  | 0.000 | 0.000 | .     | .     | -11.784 |
| filtdb<br>negative<br>control | chr11 | 61722571  | A | C | 75.916 | 76.921 | 7.450  | 8.474  | 8.025  | 9.738  | 90.663 | 93.267 | 0.864 | 0.971 | 0.000 | 0.002 | 0.542   |
| filtdb<br>negative<br>control | chr11 | 66288733  | G | C | 91.932 | 92.594 | 10.224 | 11.306 | 8.157  | 9.515  | 90.787 | 93.328 | 0.974 | 0.989 | 0.000 | 0.002 | 8.243   |
| filtdb<br>negative<br>control | chr11 | 67223920  | C | G | 66.013 | 66.013 | 0.000  | 0.000  | 4.527  | 6.049  | 77.887 | 77.887 | 0.012 | 0.007 | 0.000 | .     | 2.941   |
| filtdb<br>negative<br>control | chr11 | 67223921  | A | C | 66.013 | 66.013 | 0.000  | 0.000  | 4.527  | 5.958  | 77.887 | 77.887 | 0.012 | 0.037 | 0.000 | .     | -0.296  |
| filtdb<br>negative<br>control | chr11 | 67226097  | C | T | 84.533 | 88.079 | 13.123 | 12.396 | 11.349 | 10.443 | 91.108 | 92.002 | 0.975 | 0.978 | 0.000 | 0.006 | -0.718  |
| filtdb<br>negative<br>control | chr11 | 68133035  | T | C | 82.095 | 82.095 | 8.007  | 8.172  | 8.228  | 8.732  | 84.884 | 85.544 | 0.847 | 0.850 | 0.000 | 0.000 | -0.352  |
| filtdb<br>negative<br>control | chr11 | 68154188  | G | A | 82.656 | 82.656 | 7.826  | 7.826  | 9.083  | 8.634  | 91.048 | 91.048 | 0.983 | 0.967 | 0.000 | 0.000 | 0.028   |
| filtdb<br>negative<br>control | chr11 | 68177614  | T | C | 87.985 | 82.206 | 9.652  | 7.790  | 6.632  | 5.802  | 93.383 | 91.209 | 0.997 | 0.994 | 0.002 | 0.038 | -0.385  |
| filtdb<br>negative<br>control | chr11 | 76804729  | G | A | 84.478 | 84.478 | 11.990 | 12.070 | 14.787 | 15.104 | 94.363 | 94.192 | 0.991 | 0.991 | 0.000 | 0.052 | 0.885   |
| filtdb<br>negative<br>control | chr11 | 76833763  | G | C | 89.859 | 77.163 | 9.602  | 6.539  | 18.071 | 9.704  | 96.666 | 84.653 | 0.990 | 0.327 | 0.537 | 0.256 | -25.209 |
| filtdb<br>negative<br>control | chr11 | 76866948  | C | T | 81.490 | 85.036 | 10.478 | 8.840  | 9.571  | 9.058  | 87.601 | 88.495 | 0.801 | 0.817 | 0.000 | 0.002 | 5.076   |
| filtdb<br>negative<br>control | chr11 | 76867135  | C | T | 79.778 | 75.650 | 8.066  | 5.262  | 6.723  | 2.524  | 88.326 | 86.345 | 0.755 | 0.465 | 0.992 | 0.874 | -2.414  |
| filtdb<br>negative<br>control | chr11 | 76867903  | C | T | 79.067 | 82.613 | 8.312  | 8.140  | 6.619  | 6.048  | 87.954 | 88.848 | 0.157 | 0.322 | 0.000 | 0.006 | 0.679   |



|                               |       |           |   |   |        |        |        |        |        |        |        |        |       |       |       |       |        |
|-------------------------------|-------|-----------|---|---|--------|--------|--------|--------|--------|--------|--------|--------|-------|-------|-------|-------|--------|
| filtdb<br>negative<br>control | chr11 | 76872169  | G | A | 71.500 | 71.500 | 10.051 | 10.051 | 4.165  | 4.501  | 77.249 | 77.249 | 0.943 | 0.919 | 0.000 | 0.000 | 0.586  |
| filtdb<br>negative<br>control | chr11 | 76914106  | C | G | 79.171 | 79.171 | 5.145  | 4.966  | 3.979  | 4.271  | 84.247 | 84.492 | 0.343 | 0.385 | 0.000 | 0.006 | -0.416 |
| filtdb<br>negative<br>control | chr11 | 76918322  | T | C | 82.339 | 79.024 | 6.713  | 6.075  | 3.289  | 2.380  | 92.057 | 90.803 | 0.810 | 0.756 | 0.000 | 0.010 | -2.830 |
| filtdb<br>negative<br>control | chr11 | 76919468  | A | T | 72.873 | 77.781 | 5.453  | 8.627  | 1.771  | 5.891  | 90.183 | 92.338 | 0.773 | 0.928 | 0.000 | 0.008 | 1.558  |
| filtdb<br>negative<br>control | chr11 | 76922186  | G | C | 89.966 | 89.966 | 10.369 | 11.160 | 11.861 | 12.571 | 88.941 | 90.752 | 0.473 | 0.713 | 0.006 | 0.062 | 0.520  |
| filtdb<br>negative<br>control | chr11 | 117261488 | C | G | 82.325 | 82.034 | 9.453  | 9.258  | 6.998  | 4.471  | 89.739 | 87.007 | 0.939 | 0.809 | 0.001 | 0.070 | -1.538 |
| filtdb<br>negative<br>control | chr11 | 119215586 | C | T | 83.669 | 86.417 | 10.494 | 11.453 | 6.764  | 7.470  | 92.330 | 93.136 | 0.971 | 0.989 | 0.000 | 0.002 | 0.024  |
| filtdb<br>negative<br>control | chr12 | 1902929   | C | T | 86.715 | 86.715 | 9.915  | 9.697  | 12.030 | 11.411 | 88.580 | 88.650 | 0.825 | 0.853 | 0.000 | 0.000 | .      |
| filtdb<br>negative<br>control | chr12 | 1902933   | C | T | 86.715 | 86.715 | 9.915  | 8.678  | 12.030 | 11.706 | 88.580 | 88.517 | 0.825 | 0.710 | 0.003 | 0.148 | .      |
| filtdb<br>negative<br>control | chr12 | 48376869  | T | C | 86.370 | 86.370 | 9.253  | 9.253  | 10.733 | 10.323 | 93.030 | 93.030 | 0.991 | 0.987 | 0.000 | 0.000 | 1.779  |
| filtdb<br>negative<br>control | chr12 | 48380682  | G | A | 82.573 | 86.332 | 9.386  | 9.881  | 8.212  | 8.667  | 85.295 | 87.143 | 0.502 | 0.765 | 0.000 | 0.000 | 4.920  |
| filtdb<br>negative<br>control | chr12 | 48389709  | C | T | 86.101 | 86.152 | 9.204  | 9.294  | 9.347  | 10.695 | 88.392 | 88.438 | 0.761 | 0.722 | 0.000 | 0.022 | -0.600 |
| filtdb<br>negative<br>control | chr12 | 88532978  | T | A | 65.745 | 72.006 | 3.800  | 5.214  | 0.000  | 0.000  | 69.298 | 72.493 | 0.001 | 0.024 | 0.000 | 0.046 | 4.417  |
| filtdb<br>negative<br>control | chr12 | 89853408  | G | A | 78.643 | 78.643 | 9.491  | 9.491  | 0.799  | 1.155  | 83.717 | 83.717 | 0.968 | 0.966 | 0.000 | 0.000 | 0.281  |
| filtdb<br>negative<br>control | chr12 | 110017759 | C | T | 82.409 | 82.409 | 6.142  | 6.142  | 1.749  | 1.456  | 88.276 | 88.276 | 0.939 | 0.899 | 0.000 | 0.000 | 0.695  |
| filtdb<br>negative<br>control | chr13 | 49051481  | T | A | 91.125 | 85.103 | 7.004  | 5.709  | 2.274  | 0.000  | 88.070 | 84.875 | 0.889 | 0.368 | 0.001 | 0.062 | -2.649 |
| filtdb<br>negative<br>control | chr13 | 77566414  | C | T | 83.502 | 83.502 | 9.095  | 9.095  | 13.065 | 12.750 | 88.262 | 88.262 | 0.985 | 0.982 | 0.000 | 0.002 | .      |
| filtdb<br>negative<br>control | chr13 | 114323997 | T | C | 90.765 | 87.219 | 9.904  | 8.498  | 5.359  | 3.331  | 92.490 | 91.596 | 0.929 | 0.920 | 0.000 | 0.002 | -0.085 |
| filtdb<br>negative<br>control | chr14 | 21793236  | G | A | 87.361 | 87.361 | 10.472 | 10.472 | 8.590  | 8.982  | 93.268 | 93.268 | 0.995 | 0.995 | 0.000 | 0.002 | 0.846  |
| filtdb<br>negative<br>control | chr14 | 21796784  | G | C | 91.616 | 94.671 | 10.065 | 10.766 | 1.213  | 2.215  | 95.904 | 97.664 | 0.999 | 0.999 | 0.000 | 0.018 | 0.203  |
| filtdb<br>negative<br>control | chr14 | 21811196  | A | G | 93.769 | 93.769 | 8.727  | 8.512  | 6.455  | 6.463  | 92.755 | 92.926 | 0.949 | 0.941 | 0.000 | 0.030 | -0.018 |
| filtdb<br>negative<br>control | chr14 | 76232398  | T | C | 80.847 | 79.336 | 3.589  | 3.008  | 2.370  | 1.657  | 77.946 | 78.365 | 0.620 | 0.437 | 0.000 | 0.140 | -0.303 |
| filtdb<br>negative<br>control | chr14 | 76238203  | G | C | 86.164 | 85.404 | 9.332  | 9.256  | 6.281  | 6.379  | 92.362 | 92.121 | 0.993 | 0.996 | 0.000 | 0.016 | 0.055  |
| filtdb<br>negative<br>control | chr14 | 76245906  | T | C | 84.261 | 80.946 | 10.093 | 9.978  | 6.004  | 5.348  | 88.663 | 87.409 | 0.907 | 0.867 | 0.142 | 0.380 | -0.549 |
| filtdb                        | chr14 | 89343626  | T | C | 94.114 | 90.799 | 9.733  | 9.799  | 11.331 | 10.255 | 90.648 | 89.394 | 0.991 | 0.987 | 0.000 | 0.002 | .      |

|                         |       |          |   |   |        |        |        |        |        |        |        |        |       |       |       |       |        |
|-------------------------|-------|----------|---|---|--------|--------|--------|--------|--------|--------|--------|--------|-------|-------|-------|-------|--------|
| negative control        |       |          |   |   |        |        |        |        |        |        |        |        |       |       |       |       |        |
| filtdb negative control | chr15 | 31369123 | A | G | 87.849 | 87.849 | 8.764  | 8.764  | 0.847  | 1.243  | 87.834 | 87.834 | 0.935 | 0.935 | .     | .     | 5.104  |
| filtdb negative control | chr15 | 72105923 | G | A | 87.304 | 87.304 | 8.626  | 8.626  | 5.049  | 4.892  | 87.986 | 87.986 | 0.962 | 0.962 | .     | .     | .      |
| filtdb negative control | chr15 | 73002035 | G | A | 64.055 | 64.055 | 1.219  | 1.491  | 0.000  | 0.000  | 76.347 | 76.414 | 0.001 | 0.001 | 0.000 | 0.008 | 3.722  |
| filtdb negative control | chr15 | 90172600 | G | A | 86.804 | 92.583 | 8.703  | 10.033 | 13.775 | 16.503 | 94.906 | 97.080 | 0.995 | 0.996 | 0.000 | 0.004 | -1.560 |
| filtdb negative control | chr15 | 90190947 | T | C | 80.155 | 80.155 | 9.746  | 9.860  | 9.962  | 10.565 | 84.794 | 84.724 | 0.990 | 0.985 | 0.000 | 0.000 | -0.372 |
| filtdb negative control | chr16 | 1411805  | G | T | 82.327 | 82.327 | 9.298  | 9.298  | 9.480  | 8.003  | 87.827 | 87.827 | 0.990 | 0.984 | 0.000 | 0.008 | 0.180  |
| filtdb negative control | chr16 | 1639793  | C | G | 84.891 | 87.523 | 8.024  | 9.337  | 8.711  | 10.199 | 92.386 | 94.294 | 0.933 | 0.964 | 0.000 | 0.000 | 0.063  |
| filtdb negative control | chr16 | 3558283  | A | T | 66.750 | 72.538 | 6.371  | 6.249  | 1.262  | 2.229  | 74.897 | 77.662 | 0.020 | 0.283 | 0.001 | 0.048 | 7.311  |
| filtdb negative control | chr16 | 3580565  | T | C | 82.210 | 88.387 | 10.464 | 10.695 | 12.248 | 12.091 | 84.382 | 92.064 | 0.779 | 0.716 | 0.000 | 0.038 | 0.378  |
| filtdb negative control | chr16 | 16291871 | G | C | 84.048 | 84.048 | 9.369  | 9.369  | 8.042  | 8.783  | 89.021 | 89.021 | 0.948 | 0.920 | 0.000 | 0.000 | 0.432  |
| filtdb negative control | chr16 | 16302586 | T | C | 96.945 | 87.985 | 11.079 | 9.652  | 7.570  | 3.360  | 98.239 | 93.383 | 0.997 | 0.994 | 0.008 | 0.154 | -1.283 |
| filtdb negative control | chr16 | 16313545 | C | T | 85.935 | 85.935 | 8.383  | 8.983  | 1.972  | 1.620  | 91.601 | 91.668 | 0.719 | 0.627 | 0.003 | 0.628 | -0.875 |
| filtdb negative control | chr16 | 49525224 | G | A | 86.568 | 89.280 | 11.631 | 11.816 | 17.037 | 18.337 | 88.291 | 89.477 | 0.986 | 0.991 | 0.929 | 0.754 | .      |
| filtdb negative control | chr16 | 56532346 | T | C | 79.534 | 75.171 | 8.734  | 4.437  | 0.000  | 0.000  | 97.714 | 81.736 | 0.518 | 0.018 | 0.991 | 0.838 | -5.172 |
| filtdb negative control | chr16 | 57921752 | A | G | 82.589 | 82.589 | 9.429  | 9.429  | 8.617  | 9.063  | 85.749 | 85.749 | 0.913 | 0.944 | 0.000 | 0.000 | -0.042 |
| filtdb negative control | chr16 | 57935426 | G | A | 71.285 | 77.063 | 7.290  | 7.794  | 10.303 | 10.679 | 76.856 | 79.030 | 0.941 | 0.959 | 0.000 | 0.000 | -0.336 |
| filtdb negative control | chr16 | 57937895 | G | A | 77.241 | 80.524 | 9.056  | 9.463  | 9.138  | 9.486  | 91.556 | 92.264 | 0.943 | 0.960 | 0.000 | 0.004 | 0.168  |
| filtdb negative control | chr16 | 57949251 | G | A | 72.926 | 76.241 | 5.120  | 5.475  | 0.000  | 2.000  | 83.011 | 84.265 | 0.105 | 0.153 | 0.000 | 0.000 | 5.073  |
| filtdb negative control | chr16 | 57954448 | A | G | 79.213 | 79.699 | 6.226  | 6.993  | 4.445  | 4.444  | 86.615 | 86.751 | 0.224 | 0.195 | 0.000 | 0.054 | 0.113  |
| filtdb negative control | chr16 | 57965793 | G | T | 81.653 | 81.653 | 11.372 | 10.030 | 16.981 | 15.355 | 89.312 | 87.244 | 0.959 | 0.935 | 0.001 | 0.060 | -7.864 |
| filtdb negative control | chr16 | 57994737 | G | C | 86.804 | 86.804 | 8.703  | 8.703  | 8.705  | 9.307  | 94.906 | 94.906 | 0.991 | 0.984 | 0.000 | 0.000 | -0.556 |
| filtdb negative control | chr16 | 72133789 | G | A | 87.564 | 91.927 | 8.409  | 10.284 | 9.509  | 9.319  | 91.869 | 92.523 | 0.982 | 0.998 | 0.000 | 0.016 | 2.360  |
| filtdb negative control | chr16 | 75579242 | G | C | 81.053 | 81.053 | 7.688  | 7.688  | 5.027  | 5.169  | 85.697 | 85.697 | 0.985 | 0.964 | 0.000 | 0.002 | 0.123  |
| filtdb negative control | chr16 | 75579247 | T | C | 81.053 | 76.691 | 7.688  | 5.128  | 5.027  | 3.921  | 78.584 | 77.931 | 0.985 | 0.880 | 0.190 | 0.318 | -3.449 |

|                               |       |          |   |   |        |        |        |        |        |        |        |        |       |       |       |       |        |
|-------------------------------|-------|----------|---|---|--------|--------|--------|--------|--------|--------|--------|--------|-------|-------|-------|-------|--------|
| control                       |       |          |   |   |        |        |        |        |        |        |        |        |       |       |       |       |        |
| filtdb<br>negative<br>control | chr16 | 77323312 | C | T | 84.538 | 84.538 | 10.098 | 9.868  | 10.072 | 9.488  | 88.216 | 88.286 | 0.952 | 0.968 | 0.000 | 0.000 | 4.062  |
| filtdb<br>negative<br>control | chr16 | 77393207 | G | C | 87.864 | 87.864 | 10.077 | 10.077 | 4.626  | 4.134  | 89.421 | 89.421 | 0.995 | 0.990 | 0.000 | 0.000 | 0.069  |
| filtdb<br>negative<br>control | chr16 | 77398081 | T | C | 85.404 | 75.323 | 9.256  | 7.417  | 7.351  | 5.522  | 92.121 | 83.781 | 0.996 | 0.691 | 0.136 | 0.188 | -0.650 |
| filtdb<br>negative<br>control | chr16 | 84070510 | G | A | 87.542 | 91.087 | 12.724 | 12.239 | 14.309 | 14.049 | 94.963 | 95.857 | 0.996 | 0.994 | 0.000 | 0.000 | 5.930  |
| filtdb<br>negative<br>control | chr16 | 84070514 | A | C | 87.542 | 84.640 | 12.724 | 10.824 | 14.309 | 12.146 | 94.963 | 91.864 | 0.996 | 0.988 | 0.000 | 0.022 | -4.287 |
| filtdb<br>negative<br>control | chr17 | 1576369  | C | T | 71.738 | 71.428 | 8.043  | 6.825  | 11.466 | 11.063 | 76.143 | 75.741 | 0.923 | 0.926 | 0.000 | 0.002 | -0.852 |
| filtdb<br>negative<br>control | chr17 | 1582714  | T | C | 95.644 | 95.644 | 7.704  | 8.817  | 4.787  | 5.527  | 95.123 | 95.238 | 0.956 | 0.956 | 0.000 | 0.000 | 0.246  |
| filtdb<br>negative<br>control | chr17 | 1586998  | G | A | 0.000  | 0.000  | 2.668  | 2.358  | 0.000  | 0.000  | 87.342 | 79.660 | 0.359 | 0.423 | 0.015 | .     | 0.122  |
| filtdb<br>negative<br>control | chr17 | 6331836  | T | G | 84.032 | 84.032 | 9.470  | 11.581 | 7.955  | 10.204 | 90.428 | 92.915 | 0.867 | 0.963 | 0.000 | 0.002 | 7.301  |
| filtdb<br>negative<br>control | chr17 | 6364881  | T | C | 80.822 | 80.822 | 6.438  | 5.589  | 4.793  | 4.014  | 88.883 | 88.815 | 0.709 | 0.792 | 0.000 | 0.012 | -0.257 |
| filtdb<br>negative<br>control | chr17 | 6373737  | C | T | 75.569 | 75.569 | 8.488  | 8.904  | 8.527  | 9.495  | 85.154 | 85.035 | 0.420 | 0.397 | 0.000 | 0.002 | 0.039  |
| filtdb<br>negative<br>control | chr17 | 6380543  | C | G | 72.219 | 74.661 | 8.138  | 8.998  | 8.157  | 4.851  | 79.755 | 82.127 | 0.177 | 0.603 | 0.000 | 0.000 | 2.425  |
| filtdb<br>negative<br>control | chr17 | 7918177  | G | T | 74.907 | 68.663 | 10.742 | 7.960  | 11.089 | 8.243  | 82.850 | 78.554 | 0.704 | 0.245 | 0.735 | 0.824 | -0.465 |
| filtdb<br>negative<br>control | chr17 | 7919238  | G | T | 69.924 | 72.641 | 4.438  | 7.042  | 5.005  | 8.188  | 84.291 | 86.492 | 0.646 | 0.903 | 0.000 | 0.008 | 0.982  |
| filtdb<br>negative<br>control | chr17 | 7919754  | C | T | 85.334 | 86.845 | 13.015 | 12.411 | 10.544 | 10.929 | 94.915 | 94.496 | 0.973 | 0.981 | 0.000 | 0.000 | -3.248 |
| filtdb<br>negative<br>control | chr17 | 36489291 | C | T | 72.834 | 72.834 | 6.622  | 6.413  | 6.694  | 6.823  | 84.620 | 84.363 | 0.178 | 0.085 | 0.000 | 0.102 | -0.322 |
| filtdb<br>negative<br>control | chr18 | 6966296  | G | A | 87.845 | 87.359 | 9.281  | 8.388  | 11.914 | 11.593 | 89.199 | 89.063 | 0.979 | 0.979 | 0.001 | 0.046 | -0.007 |
| filtdb<br>negative<br>control | chr18 | 6977719  | A | G | 69.980 | 69.980 | 7.000  | 7.000  | 3.268  | 3.754  | 81.241 | 81.241 | 0.527 | 0.715 | 0.000 | 0.006 | -1.109 |
| filtdb<br>negative<br>control | chr18 | 7011490  | A | G | 81.706 | 78.392 | 10.384 | 10.288 | 9.107  | 8.971  | 81.136 | 79.882 | 0.930 | 0.910 | 0.000 | 0.002 | -2.044 |
| filtdb<br>negative<br>control | chr18 | 7015714  | T | C | 89.859 | 89.859 | 9.602  | 9.602  | 7.086  | 8.035  | 96.666 | 96.666 | 0.995 | 0.992 | 0.000 | 0.000 | 0.081  |
| filtdb<br>negative<br>control | chr19 | 3770965  | G | A | 83.392 | 85.202 | 11.329 | 11.959 | 13.806 | 13.978 | 91.163 | 90.551 | 0.974 | 0.972 | 0.000 | 0.006 | .      |
| filtdb<br>negative<br>control | chr19 | 7607441  | C | T | 85.285 | 87.388 | 9.996  | 9.423  | 10.202 | 9.713  | 90.274 | 89.621 | 0.870 | 0.924 | 0.000 | 0.000 | 0.348  |
| filtdb<br>negative<br>control | chr19 | 7607564  | T | C | 86.021 | 86.021 | 10.169 | 10.169 | 11.804 | 12.718 | 93.210 | 93.210 | 0.986 | 0.995 | 0.000 | 0.002 | -0.303 |
| filtdb<br>negative<br>control | chr19 | 54632423 | T | C | 76.195 | 73.483 | 11.082 | 10.965 | 11.039 | 10.484 | 86.448 | 85.262 | 0.989 | 0.981 | 0.000 | 0.006 | -0.329 |

|                               |       |          |   |   |        |        |        |        |        |        |        |        |       |       |       |       |         |
|-------------------------------|-------|----------|---|---|--------|--------|--------|--------|--------|--------|--------|--------|-------|-------|-------|-------|---------|
| filtdb<br>negative<br>control | chr20 | 2644407  | C | G | 73.348 | 84.171 | 0.000  | 8.928  | 2.027  | 12.757 | 77.213 | 87.509 | 0.005 | 0.931 | 0.000 | .     | 5.745   |
| filtdb<br>negative<br>control | chr20 | 21126194 | C | G | 84.044 | 81.363 | 6.883  | 5.893  | 3.743  | 2.841  | 79.805 | 77.897 | 0.935 | 0.868 | .     | .     | -2.795  |
| filtdb<br>negative<br>control | chr20 | 21186155 | G | A | 88.098 | 88.098 | 9.795  | 9.795  | 7.133  | 6.735  | 81.160 | 81.160 | 0.994 | 0.994 | .     | .     | -1.940  |
| filtdb<br>negative<br>control | chr20 | 21186155 | G | T | 88.098 | 88.098 | 9.795  | 9.795  | 7.133  | 6.480  | 81.160 | 81.160 | 0.994 | 0.994 | .     | .     | -3.931  |
| filtdb<br>negative<br>control | chr20 | 21186159 | C | T | 88.098 | 88.098 | 9.795  | 9.795  | 7.133  | 7.087  | 81.160 | 81.160 | 0.994 | 0.994 | .     | .     | -4.501  |
| filtdb<br>negative<br>control | chr20 | 21186160 | G | A | 88.098 | 88.098 | 9.795  | 9.795  | 7.133  | 6.673  | 81.160 | 81.160 | 0.994 | 0.994 | .     | .     | -5.430  |
| filtdb<br>negative<br>control | chr20 | 34095686 | C | G | 86.804 | 87.564 | 8.703  | 8.409  | 10.729 | 9.771  | 94.906 | 95.147 | 0.885 | 0.763 | 0.001 | 0.170 | 2.499   |
| filtdb<br>negative<br>control | chr20 | 34099182 | T | C | 85.321 | 82.038 | 11.215 | 10.914 | 15.870 | 14.199 | 90.243 | 89.535 | 0.964 | 0.952 | 0.000 | 0.000 | .       |
| filtdb<br>negative<br>control | chr20 | 34099183 | G | C | 85.321 | 85.854 | 11.215 | 12.240 | 15.870 | 17.709 | 90.243 | 92.156 | 0.964 | 0.981 | 0.000 | 0.002 | .       |
| filtdb<br>negative<br>control | chr20 | 62612675 | G | A | 78.603 | 78.293 | 5.505  | 4.744  | 8.469  | 7.553  | 90.291 | 89.889 | 0.522 | 0.403 | 0.001 | 0.212 | .       |
| filtdb<br>negative<br>control | chr21 | 45750346 | C | A | 81.203 | 68.588 | 7.528  | 0.000  | 8.438  | 1.469  | 90.225 | 79.357 | 0.808 | 0.009 | 0.000 | 0.000 | -10.667 |
| filtdb<br>negative<br>control | chrX  | 31893307 | T | G | 84.901 | 84.901 | 9.461  | 9.461  | 1.025  | 1.025  | 89.726 | 89.726 | 0.929 | 0.929 | 0.068 | 0.496 | 2.064   |
| filtdb<br>negative<br>control | chrX  | 32503227 | G | C | 77.519 | 75.188 | 4.629  | 4.788  | 3.556  | 2.729  | 86.000 | 84.189 | 0.134 | 0.047 | 0.000 | 0.086 | -0.210  |
| filtdb<br>negative<br>control | chrX  | 49075777 | C | T | 77.244 | 81.606 | 5.031  | 5.613  | 7.452  | 8.559  | 78.987 | 79.641 | 0.845 | 0.985 | 0.000 | 0.006 | 0.677   |
| filtdb<br>negative<br>control | chrX  | 49084492 | C | T | 77.530 | 77.220 | 6.745  | 6.035  | 0.000  | 0.000  | 90.070 | 89.668 | 0.119 | 0.107 | 0.000 | 0.016 | 0.166   |
| filtdb<br>negative<br>control | chrX  | 85226596 | G | C | 84.497 | 84.497 | 9.459  | 9.459  | 0.000  | 0.000  | 88.860 | 88.860 | 0.974 | 0.974 | 0.000 | 0.000 | .       |
